# Supplementary material for: An iterative approach to novel polyamines via nucleophilic ring-opening of aziridinium ions with β-amino alcohols
Source: Royal Society of Chemistry journal article supplement (doi:10.1039/b401447b), 2004-01-01
Supplement: b401447b.doc [file b401447b.doc]

An Iterative Approach to Novel Polyamines *via* Nucleophilic Ring-Opening of Aziridinium Ions with **-Amino Alcohols

Christopher McKay, Robert J. Wilson and Christopher M. Rayner*

Department of Chemistry, University of Leeds, Leeds LS2 9JT, UK. E-mail:[chrisr@chem.leeds.ac.uk](mailto:chrisr@chem.leeds.ac.uk)

**Supplementary Information**

**(*S*)-2-*N*-Benzyl-*N*-allylamino-butan-1-ol**7(c) **(5)**

*N*-Benzyl-*N*-allylamino-L-alanine methyl ester (1.14 g, 4.9 mmol) was dissolved in tetrahydrofuran (25 ml) and the solution cooled to 0 C. Lithium aluminium hydride (1.0 M solution in diethyl ether, 12.3 mmol, 12.3 ml, 2.50 eq.) was added dropwise and the solution stirred at 0 C for 30 min, then allowed to warm to RT. The reaction was quenched by the addition of water (1 ml), diluted with diethyl ether, dried (Na2SO4) and concentrated *in vacuo* to yield (*S*)-2-*N*-benzyl-*N*-allylamino-butan-1-ol **5** as a colourless oil (862 mg, 4.20 mmol, 86 %). Used without further purification; []D +4.1 (*c* 1.2 in CHCl3); **max (neat)/cm-1 3434, 3064, 3028, 2965, 2931, 1642, 1602 and 1495; **H (300 MHz; CDCl3; Me4Si) 0.92 (3H, d, *J* 6.6, CH3), 2.92 (1H, dd, *J* 14.0, 8.3, one of CH2OH), 3.03 (1H, dd, *J* 14.0, 8.3, other CH2OH), 3.09 (1H, dd, *J* 8.3, 6.6, NCH), 3.23 (1H, dd, *J* 14.0, 10.2, one of *allyl*-CH2), 3.27 (1H, dd, *J* 14.0, 1.6, other *allyl*-CH2), 3.33 (1H, d, *J* 13.6, one of NCH2Ph), 3.84 (1H, d, *J* 13.6, other NCH2Ph), 5.13 (1H, dd, *J* 10.2, 1.6, *trans* *H*2C=CH), 5.16 (1H, dq, *J* 17.3, 1.6, *cis* *H*2C=CH), 5.80 (1H, dddd, *J* 17.3, 10.2, 1.6, 0.9, *H*C=CH2), 7.21-7.37 (5H, m, Ph); **C (75 MHz; CDCl3; Me4Si) 9.4 (CH3), 52.3 (CH2Ph), 53.2 (*allyl*-CH2), 55.1 (NCH), 63.1 (CH2OH), 117.9 (CH=*C*H2), 127.4 (Ph), 127.5 (Ph), 128.9 (Ph), 129.3 (Ph), 137.0 (*C*H=CH2), 139.8 (Ph); *m/z* (EI) 205 (M+, 41 %), 174 (68), 91 (100).

**(*S*)-2-(*N*-Benzylamino)-3-phenyl-propan-1-ol**7(d) **(6a)**

To a stirred solution of L-phenylalaninol (2.00 g, 13.2 mmol) and triethylamine (1.80 ml, 13.2 mmol, 1.00 eq.) in methanol (15 ml) was added benzaldehyde (0.85 ml, 13.2 mmol, 1.00 eq.) The mixture was stirred at RT for 2 h. The reaction was cooled to 0 C and sodium borohydride (1.00 g, 26.4 mmol, 2.00 eq.) was added portionwise over 30 min. The solution was partitioned between hydrochloric acid (4M, 30 ml) and diethyl ether (60 ml). The organic phase was extracted with hydrochloric acid (4M, 2  20 ml). The combined aqueous phases were extracted with diethyl ether (2  20 ml) and the organic phases discarded. The aqueous phase was neutralised by the addition of solid sodium hydrogencarbonate, then extracted with diethyl ether (3  30 ml). The combined organic phases were dried (MgSO4) and concentrated *in vacuo* to afford (*S*)-2-(*N*-benzylamino)-3-phenyl-propan-1-ol **6a** as colourless needles (1.50 g, 6.10 mmol, 46 %). Used without further purification; mp 63-65 C; (lit. 67-68 C); []D -9.0 (*c* 1.2 in CHCl3); **max (nujol mull)/cm-1 3289, 3026, 2922, 1495, 1453 and 1378; **H (300 MHz; CD3OD) 2.05 (2H, b s, OH, NH), 2.79 (2H, dd, *J* 13.6, 7.0, CH2OH), 2.96 (1H, ddd, *J* 7.0, 5.3, 3.9, NHC*H*), 3.33 (1H, dd, *J* 10.8, 5.3, one of CHC*H*2Ph), 3.64 (1H, dd, *J* 10.8, 3.9, other CHC*H*2Ph), 3.77, (2H, s, NCH2Ph), 7.14-7.33 (10H, m, Ph); **C (75 MHz; CD3OD) 38.3 (CH*C*H2Ph), 51.4 (NCH2Ph), 59.8 (CH2OH), 62.9 (NCH), 126.9 (Ph), 127.7 (Ph), 128.6 (Ph), 129.0 (Ph), 129.6 (Ph), 138.7 (Ph); *m/z* (ES) 242 (MH+, 100 %).

**(*S*)-*N*-Benzyl-2-amino-3-methyl-butan-1-ol**7(d) **(6b)**

(*S*)-*N*-Benzyl-L-valine methyl ester (5.00 g, 22.6 mmol) was added to a suspension of lithium aluminium hydride (2.60 g, 67.8 mmol, 3.00 eq.) in tetrahydrofuran (150 ml) at 0 C. The mixture was stirred at 0 C for 30 min, then allowed to warm to RT. The reaction was quenched by the consecutive addition of water (2.6 ml), sodium hydroxide solution (1 M, 2.6 ml) and water (6.0 ml) and extracted with diethyl ether. The organic extracts were dried (Na2SO4) and concentrated *in vacuo* to yield (*S*)-*N*-benzyl-2-amino-3-methyl-butan-1-ol **6b** as a colourless oil (3.70 mg, 19.0 mmol, 84 %). Used without further purification; []D +13.0 (*c* 2.5 in CHCl3); (lit. +10.9, *c* 1.0 in CHCl3); **max (neat)/cm-1 3357, 3028, 2958, 1664, 1495 and 1454; **H (300 MHz; CD3OD) 0.91 (3H, d, *J* 6.8, CH3), 0.97 (3H, d, *J* 6.8, CH3), 1.87 (1H, ddd, *J* 7.0, 6.8, 4.2, NCH), 2.47 (1H, qd, *J* 6.8, 4.2, CHC*H*(CH3)2), 3.37 (1H, dd, *J* 10.7, 7.0, one of CH2OH), 3.64 (1H, dd, *J* 10.7, 4.2, other CH2OH), 3.78 (1H, d, *J* 12.8, one of NCH2Ph), 3.80 (1H, d, *J* 12.8, other NCH2Ph), 7.24-7.37 (5H, m, Ph); **C (75 MHz; CD3OD) 18.8 (CH3), 20.0 (CH3), 29.2 (CH*C*H(CH3)2), 51.7 (NCH2Ph), 60.8 (CH2OH), 64.2 (NCH), 127.4 (Ph), 127.5 (Ph), 127.9 (Ph), 128.5 (Ph), 128.9 (Ph), 140.8 (Ph); *m/z* (EI) 193 (M+, 33 %), 161 (83), 149 (71), 91 (100), 65 (52).

**(*S*)-*N*-Benzyl-2-amino-4-methyl-pentan-1-ol**7(d) **(10)**

(*S*)-*N*-Benzyl-L-leucine methyl ester (1.60 g, 6.80 mmol) was dissolved in tetrahydrofuran (20 ml) and the solution cooled to 0 C. Lithium aluminium hydride (1.0 M solution in diethyl ether, 15.0 ml, 15.0 mmol, 2.50 eq.) was added dropwise and the solution stirred at 0 C for 30 min, then allowed to warm to RT. The reaction was quenched by the addition of water until gas evolution ceased then diluted with diethyl ether. The mixture was filtered to remove inorganic salts, dried (Na2SO4) and concentrated *in vacuo* to yield (*S*)-*N*-benzyl-2-amino-4-methyl-pentan-1-ol **10** as colourless needles (790 mg, 3.80 mmol, 56 %). Used without further purification; mp 72.5-75 C; []D +19.7 (*c* 1.20 in CHCl3); **max (nujol mull)/cm-1 3286, 3060, 3021, 2925 and 1601; **H (300 MHz; CDCl3; Me4Si) 0.88 (3H, d, *J* 6.1, CH3), 0.90 (3H, d, *J* 6.1, CH3), 1.24 (1H, ddd, *J* 13.7, 6.9, 6.7, one of C*H*2CH(CH3)2), 1.42 (1H, ddd, *J* 13.7, 6.9, 6.7, other C*H*2CH(CH3)2), 1.63 (1H, ddd, *J* 13.4, 6.7, 6.1, C*H*(CH3)2), 2.76 (1H, ddd, *J* 13.2, 6.9, 6.7, NCH), 3.27 (1H, dd, *J* 10.6, 6.7, one of C*H*2OH), 3.65 (1H, dd, *J* 10.6, 6.9, other C*H*2OH), 3.74 (1H, d, *J* 12.9, one of NCH2Ph), 3.80 (1H, d, *J* 12.9, other NCH2Ph), 7.24-7.37 (5H, m, Ph); **C (75 MHz; CDCl3; Me4Si) 23.1 (CH3), 23.4 (CH3), 25.4 (*C*H(CH3)2), 41.7 (*C*H2CH(CH3)2), 51.5 (*C*H2OH), 56.6 (NCH), 63.6 (NCH2Ph), 127.5 (Ph), 128.6 (Ph), 128.9 (Ph), 140.8 (Ph); *m/z* (EI) 206 (M+, 4 %), 190 (12), 176 (30), 91 (100).

**General procedure for aziridinium ion mediated **-amino alcohol oligomerisation:** *N*,*N*-Protected **-amino alcohol was dissolved in anhydrous dichloromethane and the solution cooled to –78 C. Triethylamine (distilled from CaH2, 1.5 eq.) was added, followed by trifluoromethanesulfonic anhydride (1.3 eq.) then the solution was stirred at –78 C for 1 h before being allowed to warm to RT. A secondary **-amino alcohol (1.1 eq.) dissolved in anhydrous dichloromethane was then added and the mixture stirred at RT for 2-12 h. The reaction was quenched with either saturated aq. NaHCO3 solution or 1 M aq. NaOH and the product extracted into dichloromethane. The organic extracts were combined, dried (Na2SO4) and concentrated *in vacuo*. The product was purified by silica gel flash chromatography, eluting with ethyl acetate / *n*-hexane mixtures.

**(*S*)-2-*N*-Benzyl-*N*-[(S)-2-(*N*-allyl-*N*-benzylamino)-propyl]-amino-3-phenyl-propan-1-ol (8a)**

(*S*)-2-(*N*-Allyl-*N*-benzylamino)-butan-1-ol (**5**) (205 mg, 1.00 mmol) was dissolved in dichloromethane (8 ml), and the solution cooled to –78 C. Triethylamine (219 l, 1.50 mmol, 1.50 eq.) was added, followed by trifluoromethanesulfonic anhydride (209 l, 1.30 mmol, 1.30 eq.) The solution was stirred at –78 C for 1 h then allowed to warm to RT. (*S*)-*N*-Benzyl-2-amino-3-phenyl-propan-1-ol (**6a**) (265 mg, 1.10 mmol, 1.10 eq.) in dichloromethane (2 ml) was added and the mixture stirred at RT for 12 h. The reaction was quenched with saturated aqueous sodium hydrogencarbonate solution (10 ml) and extracted with dichloromethane (3  10 ml). The organic extracts were combined, dried (Na2SO4) and concentrated *in vacuo*. The product was purified by silica gel flash chromatography (eluent: ethyl acetate / petroleum ether 25 : 75) to yield *(S)-2-N-benzyl-N-[(S)-2-(N-allyl-N-benzylamino)-propyl]-amino-3-phenyl-propan-1-ol* as a colourless oil (402 mg, 0.94 mmol, 94 %); []D +15.3 (*c* 1.1 in CHCl3); **max (neat)/cm-1 3391, 3062, 3026, 2963, 2831, 1641, 1602 and 1495; **H (500 MHz; CDCl3; Me4Si) 0.83 (3H, d, *J* 6.4, CH3), 2.12 (1H, dd, *J* 14.1, 3.4, one of NCHC*H*2N), 2.24 (1H, dd, *J* 13.7, 9.2, one of CHC*H*2Ph), 2.70 (1H, dd, *J* 14.1, 3.4, other NCHC*H*2N), 2.74 (1H, dd, *J* 13.7, 2.6, other CHC*H*2Ph), 2.85 (1H, dd, *J* 13.3, 4.7, one of CH2OH), 2.90 (1H, dd, *J* 14.5, 1.7, one of *allyl*-CH2), 2.93 (1H, dd, *J* 14.5, 1.7, other *allyl*-CH2), 2.98 (1H, dd, *J* 6.4, 3.4, NC*H*CH2N), 3.15 (1H, dd, *J* 13.3, 4.7, other CH2OH), 3.22 (1H, d, *J* 12.8, NCH2Ph), 3.31 (1H, ddd, *J* 9.2, 4.7, 2.6, NC*H*CH2OH), 3.37 (1H, d, *J* 12.8, NCH2Ph), 3.73 (1H, d, *J* 13.3, NCH2Ph), 3.77 (1H, d, *J* 13.3, NCH2Ph), 5.14 (1H, dd, *J* 8.1, 1.7, *cis* *H*2C=CH), 5.17 (1H, dt, *J* 15.0, 1.7, *trans* *H*2C=CH), 6.03 (1H, dddd, *J* 15.0, 8.1, 3.0, 1.7, H2C=C*H*), 6.93-7.35 (15H, m, Ph); **C (125 MHz; CDCl3; Me4Si) 10.8 (CH3), 32.1 (CH2Ph), 51.8 (NCH), 52.0 (2  NCH2Ph), 54.5 (*allyl*-CH2), 55.6 (NCH*C*H2N), 60.8 (NCH), 61.5 (CH2OH), 117.9 (H2*C*=CH), 126.3 (Ph), 126.6 (Ph), 127.4 (Ph), 128.6 (Ph), 128.7 (Ph), 128.8 (Ph), 128.9 (Ph), 129.0 (Ph), 129.3 (Ph), 129.6 (Ph), 129.7 (Ph), 130.2 (Ph), 137.6 (H2C=*C*H), 139.0 (Ph), 139.5 (Ph), 139.6 (Ph); *m/z* (ES) 429 (MH+, 100 %); *m/z* (EI) 429 (MH+, 6 %), 387 (10), 337 (27), 300 (25), 254 (15), 205 (7), 174 (87), 117 (7), 91 (100), 65 (17); HRMS: *m/z* (ES) 430.2956 (MH+, C29H38N2O requires 430.2984.)

**(*S*)-2-*N*-Benzyl-*N*-[(*S*)-2-(*N*-allyl-*N*-benzylamino)-propyl]-amino-3-methyl-butan-1-ol (8b)**

(*S*)-2-(*N*-Allyl-*N*-benzylamino)-butan-1-ol (**5**) (1.40 g, 6.80 mmol) was dissolved in dichloromethane (15 ml), and the solution cooled to –78 C. Triethylamine (1.20 ml, 8.90 mmol, 1.30 eq.) was added, followed by trifluoromethanesulfonic anhydride (1.30 ml, 7.50 mmol, 1.10 eq.) The solution was stirred at –78 C for 1 h then allowed to warm to RT. (*S*)-*N*-Benzyl-2-amino-3-methyl-butan-1-ol (**6b**) (1.50 g, 7.50 mmol, 1.10 eq.) in dichloromethane (5 ml) was added and the mixture stirred at RT for 12 h. The reaction was quenched with aqueous sodium hydroxide solution (1 M, 15 ml) and extracted with dichloromethane (3  10 ml). The organic extracts were combined, washed with brine, dried (Na2SO4) and concentrated *in vacuo*. The product was purified by silica gel flash chromatography (eluent: ethyl acetate / *n*-hexane 20 : 80) to yield *(S)-2-N-benzyl-N-[(S)-2-(N-allyl-N-benzylamino)-propyl]-amino-3-methyl-butan-1-ol* as a pale pink oil (1.78 g, 4.70 mmol, 69 %); []D +45.6 (*c* 0.5 in CHCl3); **max (neat)/cm-1 3399, 3063, 3027, 2959, 2822, 1640, 1602, 1494 and 1453; **H (500 MHz; CDCl3; Me4Si) 0.78 (3H, d, *J* 6.4, CH3), 0.80 (3H, d, *J* 6.7, CH3), 0.93 (3H, d, *J* 6.7, CH3), 1.84 (1H, dd, *J* 8.4, 6.7, C*H*(CH3)2), 2.36 (1H, apparent dd, *J* 8.4, 6.7, NC*H*CH2OH), 2.42 (1H, dd, *J* 13.7, 1.2, one of *allyl*-CH2), 2.69 (1H, dd, *J* 13.7, 10.9, other *allyl*-CH2), 2.80 (1H, dd, *J* 13.6, 4.2, one of NCHC*H*2N), 2.97 (1H, ddd, *J* 6.4, 4.2, 3.9, NC*H*CH2N), 3.05 (1H, dd, *J* 13.6, 3.9, other NCHC*H*2N), 3.20 (1H, d, *J* 13.3, one of NCH2Ph), 3.35 (1H, dd, *J* 10.7, 8.4, one of CH2OH), 3.54 (1H, d, *J* 13.4, one of NCH2Ph), 3.58 (1H, dd, *J* 10.7, 8.4, other CH2OH), 3.66 (1H, d, *J* 13.3, one of NCH2Ph), 3.80 (1H, d, *J* 13.3, one of NCH2Ph), 5.10 (1H, dd, *J* 16.2, 1.2, *trans* *H*2C=CH), 5.14 (1H, dd, *J* 10.9, 1.2, *cis* *H*2C=CH), 5.97 (1H, dddd, *J* 16.2, 10.9, 8.8, 4.3, H2C=C*H*), 7.13-7.34 (10H, m, Ph); **C (125 MHz; CDCl3; Me4Si) 10.9 (CH3), 20.8 (CH3), 22.9 (CH3), 28.9 (*C*H(CH3)2), 51.7 (NCH2Ph), 52.1 (N*C*HCH2N), 53.8 (NCH2Ph), 54.5 (*allyl*-CH2), 55.7 (NCH*C*H2N), 60.8 (CH2OH), 65.6 (N*C*HCH2OH), 117.8 (*C*H2=CH), 127.2 (Ph), 127.4 (Ph), 128.5 (Ph), 128.6 (Ph), 129.1 (Ph), 129.8 (Ph), 130.1 (Ph), 137.4 (CH2=*C*H), 139.3 (Ph), 140.5 (Ph); *m/z* (ES) 381 (MH+, 100 %); (Found: C, 78.7; H, 9.70; N, 7.5. C25H36N2O requires C, 78.9; H, 9.53; N, 7.4 %)

**(*S*)-2-*N*-Benzyl-*N*-[(*S*)-2-*N*-benzyl-*N*-{(*S*)-2-*N*-allyl-*N*-benzylaminopropyl}amino-3-methylbutyl]amino-4-methyl-pentan-1-ol (11)**

(*S*)-2-*N*-Benzyl-*N*-[(*S*)-2-(*N*-allyl-*N*-benzylamino)-propyl]-amino-3-methyl-butan-1-ol (**8b**) (100 mg, 0.26 mmol) was dissolved in dichloromethane (8 ml), and the solution cooled to –78 C. Triethylamine (55.0 l, 0.39 mmol, 1.50 eq.) was added, followed by trifluoromethanesulfonic anhydride (57.0 l, 0.34 mmol, 1.30 eq.) The solution was stirred at –78 C for 1 h then allowed to warm to RT. (*S*)-*N*-benzyl-2-amino-4-methyl-pentan-1-ol (**10**) (60.0 mg, 0.29 mmol, 1.10 eq.) in dichloromethane (2 ml) was added and the mixture stirred at RT for 12 h. The reaction was quenched with saturated aqueous sodium hydrogencarbonate solution (5 ml) and extracted with dichloromethane (3  10 ml). The organic extracts were combined, dried (Na2SO4) and concentrated *in vacuo*. The product was purified by silica gel flash chromatography (eluent: ethyl acetate / petroleum ether 30 : 70) to yield *(S)-2-N-benzyl-N-[(S)-2-N-benzyl-N-{(S)-2-N-allyl-N-benzylaminopropyl}-amino-3-methylbutyl]-amino-4-methyl-pentan-1-ol* as a colourless oil (115 mg, 0.20 mmol, 77 %); []D +0.8 (*c* 2.1 in CHCl3); **max (neat)/cm-1 3411, 3084, 3062, 3027, 2955, 2868, 1642, 1602, 1494 and 1453; **H (500 MHz; CDCl3; Me4Si) 0.71 (3H, d, *J* 6.3, Ala CH3), 0.76 (3H, d, *J* 6.7, Leu CH3), 0.83 (3H, d, *J* 6.5, Val CH3), 0.85 (3H, d, *J* 6.7, Leu CH3), 0.88 (3H, d, *J* 6.5, Val CH3), 1.07-1.12 (1H, m, one of Leu C*H*2CH(CH3)2), 1.34-1.42 (1H, m, one of Leu C*H*2CH(CH3)2), 1.49-1.57 (1H, m, Leu C*H*(CH3)2), 1.65-1.74 (1H, m, Val C*H*(CH3)2), 2.26 (1H, dd, *J* 12.5, 9.8, one of CH2OH), 2.40-2.46 (1H, m, Val NCH), 2.79-2.84 (2H, m, Ala NCH and Leu NCH), 2.86-2.92 (3H, m, Val NCHC*H*2N, other CH2OH), 3.00-3.03 (1H, m, one of *allyl*-CH2), 3.10-3.18 (1H, m, other *allyl*-CH2), 3.21 (1H, d, *J* 13.8, one of NCH2Ph), 3.30 (1H, d, *J* 13.8, one of NCH2Ph), 3.31 (1H d, *J* 13.8, one of NCH2Ph), 3.51 (1H, d, *J* 13.8, other NCH2Ph), 3.51-3.57 (2H, m, Ala NCHC*H*2N), 3.67 (1H, *J* 13.8, other NCH2Ph), 3.78 (1H, *J* 13.8, other NCH2Ph), 5.00-5.13 (2H, m, *H*2C=CH), 5.72-5.80 (1H, m, C*H*=CH2), 7.15-7.39 (15H, m, Ph); **C (75 MHz; CDCl3; Me4Si) 11.6 (Ala CH3), 20.7 (Val CH3), 21.1 (Val CH3), 22.3 (Leu CH3), 24.0 (Leu CH3), 25.4 (Val *C*H(CH3)2), 30.3 (Leu *C*H(CH3)2), 33.8 (Leu *C*H2CH(CH3)2), 48.3 (*allyl*-CH2), 52.8 (NCH), 53.5 (CH2OH), 53.8 (NCH2Ph), 54.4 (NCH2Ph), 55.4 (NCH*C*H2N), 56.5 (NCH*C*H2N), 58.5 (NCH), 61.7 (NCH2Ph), 62.6 (NCH), 116.4 (H2*C*=CH), 126.5 (Ph), 126.6 (Ph), 127.1 (Ph), 127.9 (Ph), 128.1 (Ph), 128.2 (Ph), 128.4 (Ph), 128.5 (Ph), 128.7 (Ph), 129.1 (Ph), 129.3 (Ph), 129.6 (Ph), 137.6 (H2C=*C*H), 139.7 (Ph), 140.6 (Ph), 140.8 (Ph); *m/z* (ES) 570 (MH+, 100 %), 480 (22), 363 (26), 285 (90); HRMS: *m/z* (ES) 570.4448 (MH+, C38H56N3O requires 570.4423.)

**(*S*)-2-*N*-Benzyl-((*S*)-2-*N*-benzyl-*N*-[(*S*)-2-*N*-benzyl-*N*-{(*S*)-2-*N*-allyl-*N*-benzylaminopropyl}amino-3-methylbutyl]amino-4-methyl-pentyl)amino-3-phenyl-propan-1-ol (12)**

(*S*)-2-*N*-Benzyl-*N*-[(*S*)-2-*N*-benzyl-*N*-{(*S*)-2-*N*-allyl-*N*-benzylaminopropyl}amino-3-methylbutyl]amino-4-methyl-pentan-1-ol (**11**) (1.20 g, 2.10 mmol) was dissolved in dichloromethane (30 ml), and the solution cooled to –78 C. Triethylamine (0.15 ml, 2.30 mmol, 0.50 eq.) was added, followed by trifluoromethanesulfonic anhydride (0.39 ml, 2.30 mmol, 1.10 eq.) The solution was stirred at –78 C for 1 h then allowed to warm to RT. (*S*)-*N*-Benzyl-2-amino-3-phenyl-propan-1-ol (**6a**) (0.56 g, 2.30 mmol, 1.10 eq.) in dichloromethane (10 ml) was added and the mixture stirred at RT for 12 h. The reaction was quenched with aqueous sodium hydroxide solution (1 M, 40 ml) and extracted with dichloromethane (2  40 ml). The organic extracts were combined, dried (Na2SO4) and concentrated *in vacuo*. The product was purified by silica gel flash chromatography (eluent: ethyl acetate / *n*-hexane 30 : 70) to yield *(S)-2-N-benzyl-((S)-2-N-benzyl-N-[(S)-2-N-benzyl-N-{(S)-2-N-allyl-N-benzylaminopropyl}amino-3-methylbutyl]amino-4-methyl-pentyl)amino-3-phenyl-propan-1-ol* as a colourless oil (1.60 g, 2.00 mmol, 99 %); []D -60.5 (*c* 0.8 in CHCl3); HPLC retention time 9.3 min (conditions: Chiralcel OD-H, 10 % isopropanol / *n*-hexane, 220 nm UV detection, flow rate 0.5 ml min-1); **max (neat)/cm-1 3085, 3063, 3028, 2954, 1642, 1602, 1494, 1454 and 1386; **H (500 MHz; CDCl3; Me4Si) 0.44 (3H, d, *J* 6.4, Ala CH3), 0.79 (3H, d, *J* 6.8, Leu CH3), 0.81 (3H, d, *J* 6.8, Leu CH3), 0.87 (3H, d, *J* 6.4, Val CH3), 0.90 (3H, d, *J* 6.4, Val CH3), 1.11-1.13 (1H, m, Val C*H*(CH3)2), 1.34-1.39 (1H, m, Leu C*H*(CH3)2), 1.55-1.61 (1H, m, Ala NCH), 1.65-1.71 (1H, m, one of Leu C*H*2CH(CH3)2), 1.94-1.99 (1H, m, other Leu C*H*2CH(CH3)2), 2.24-2.34 (2H, m, Phe CH2Ph), 2.48-2.64 (3H, m, Phe NCH, NCHC*H*2N), 2.66-2.70 (2H, m, Val NCH, Leu NCH), 2.79-2.83 (2H, m, *allyl*-CH2), 2.84-2.88 (3H, m, one of C*H*2OH, NCHC*H*2N), 2.96-3.04 (2H, m, NCHC*H*2N), 3.13 (1H, dd, *J* 13.3, 3.8, other C*H*2OH), 3.24 (1H, d, *J* 13.7, one of NC*H*2Ph), 3.31 (1H, d, *J* 13.7, one of NC*H*2Ph), 3.45 (1H, d, *J* 13.6, one of NC*H*2Ph), 3.54 (1H, d, *J* 13.5, one of NC*H*2Ph), 3.65 (1H, d, *J* 13.7, one of NC*H*2Ph), 3.72 (1H, d, *J* 13.7, one of NC*H*2Ph), 3.78 (1H, d, *J* 13.5, one of NC*H*2Ph), 3.91 (1H, d, *J* 13.5, one of NC*H*2Ph), 4.92 (1H, dd, *J* 9.8, 1.5, *cis* *H*2C=CH), 5.07 (1H, dd, *J* 17.1, 1.5, *trans* *H*2C=CH), 5.62-5.70 (1H, m, *H*C=CH2), 7.09-7.33 (25H, m, Ph); **C (125 MHz; CDCl3; Me4Si) 11.7 (CH3), 18.0 (CH3), 21.2 (CH3), 21.5 (CH3), 23.9 (CH3), 24.2 (CH), 29.0 (CH), 32.5 (CH2), 41.3 (CH2), 45.2 (CH2), 51.4 (CH2), 52.6 (CH), 53.3 (CH2), 53.8 (CH2), 55.0 (CH2), 55.1 (CH2), 56.1 (CH), 56.3 (CH2), 57.1 (CH2), 61.1 (CH2), 62.1 (CH), 64.3 (CH), 116.3 (H2*C*=CH), 126.2 (Ph), 126.6 (Ph), 126.7 (Ph), 127.3 (Ph), 127.9 (Ph), 128.0 (Ph), 128.1 (Ph), 128.3 (Ph), 128.4 (Ph), 128.5 (Ph), 128.8 (Ph), 129.1 (Ph), 137.6 (H2C=*C*H), 139.4 (Ph), 139.6 (Ph), 140.3 (Ph), 140.6 (Ph), 141.0 (Ph); *m/z* (ES) 794 (MH+, 100 %), 606 (41), 397 (39), 365 (35), 324 (59); HRMS: *m/z* (ES) 793.5791 (MH+, C54H73N4O requires 793.5784.)

**(*S*)-2-*N*-Benzyl-((*S*)-2-*N*-benzyl-*N*-[(*S*)-2-*N*-benzyl-*N*-{(*S*)-2-*N*-allyl-*N*-benzylaminopropyl}amino-3-phenylpropyl]amino-3-methyl-butyl)amino-propan-1-ol (14)**

(*S*)-2-*N*-Benzyl-[(*S*)-2-*N*-benzyl-{(*S*)-2-*N*-benzylamino-propyl}amino-3-phenyl-propyl]amino-3-methyl-butan-1-ol (400 mg, 0.66 mmol) was dissolved in dichloromethane (10 ml), and the solution cooled to –78 C. Triethylamine (102 l, 0.73 mmol, 1.10 eq.) was added, followed by trifluoromethanesulfonic anhydride (123 l, 0.73 mmol, 1.10 eq.) The solution was stirred at –78 C for 1 h then allowed to warm to RT. (*S*)-2-(*N*-Benzylamino)-butan-1-ol (142 mg, 0.86 mmol, 1.30 eq.) in dichloromethane (5 ml) was added and the mixture stirred at RT for 12 h. The reaction was quenched with saturated aqueous sodium hydrogencarbonate solution (10 ml) and extracted with dichloromethane (3  20 ml). The organic extracts were combined, dried (Na2SO4) and concentrated *in vacuo*. The product was purified by silica gel flash chromatography (eluent: ethyl acetate / *n*-hexane / ammonia solution 20 : 75 : 5) to yield *(S)-2-N-benzyl-((S)-2-N-benzyl-N-[(S)-2-N-benzyl-N-{(S)-2-N-allyl-N-benzylaminopropyl}amino-3-phenylpropyl]amino-3-methyl-butyl)amino-propan-1-ol* as a colourless oil which solidified upon standing (273 mg, 0.36 mmol, 55 %); mp 77-79 C; []D –45.3 (*c* 0.3 in CHCl3); **max (neat)/cm-1 3435, 3062, 3026, 2960, 2831, 1641, 1602, 1494 and 1452; HPLC retention time 8.9 min (conditions: Chiralcel OD-H, 10 % isopropanol / *n*-hexane, 220 nm UV detection, flow rate 0.5 ml min-1); **H (500 MHz; CDCl3; Me4Si) 0.89 (3H, d, *J* 6.8, CH3), 0.92 (3H, d, *J* 6.8, CH3), 0.97 (3H, d, *J* 7.5, CH3), 0.98 (3H, d, *J* 7.5, CH3), 1.18-1.30 (1H, m, NCH), 1.51-1.57 (1H, m, NCH), 1.65-1.73 (1H, m, C*H*(CH3)2), 2.12-3.11 (12H, m, C*H*2Ph, C*H*2OH, NC*H*  2 and NCHC*H*2N  3), 2.79-2.82 (1H, m, one of *allyl*-CH2), 2.88-2.92 (1H, m, other *allyl*-CH2), 3.22 (1H, d, *J* 13.7, NCH2Ph), 3.23 (1H, d, *J* 13.3, NCH2Ph), 3.24 (1H, d, *J* 13.3, NCH2Ph), 3.25 (1H, d, *J* 13.3, NCH2Ph), 3.34 (1H, d, *J* 13.7, NCH2Ph), 3.60 (1H, d, *J* 13.3, NCH2Ph), 3.81 (1H, d, *J* 13.7, NCH2Ph), 3.89 (1H, d, *J* 13.7, NCH2Ph), 7.04-7.37 (25H, m, Ph); **C (125 MHz; CDCl3; Me4Si) 8.4 (CH3), 8.5 (CH3), 11.1 (CH3), 12.7 (CH3), 21.1 (CH), 36.5 (CH2), 48.6 (CH2), 50.5 (CH2), 52.2 (CH2), 53.1 (CH2), 53.7 (CH2), 53.9 (CH2), 54.0 (CH2), 55.4 (CH2), 55.7 (CH), 60.1 (CH), 60.4 (CH2), 63.2 (CH), 63.6 (CH), 116.3 (*C*H2=CH), 125.3 (Ph), 126.4 (Ph), 126.6 (Ph), 126.7 (Ph), 127.3 (Ph), 127.1 (Ph), 127.8 (Ph), 127.9 (Ph), 128.0 (Ph), 128.2 (Ph), 128.4 (Ph), 128.5 (Ph), 128.6 (Ph), 128.8 (Ph), 128.9 (Ph), 129.1 (Ph), 129.3 (Ph), 129.5 (Ph), 129.6 (Ph), 137.6 (CH2=*C*H), 139.6 (Ph), 140.5 (Ph), 140.6 (Ph), 140.9 (Ph), 141.0 (Ph); HRMS: *m/z* (ES) 751.5307 (M+, C51H66N4O requires 751.5315.)

**Methods for metal-catalysed deallylation of polyamines:**

***Method A: Wilkinson’s catalyst***

The polyamine was dissolved in acetonitrile / water (84 : 16), tris(triphenylphosphine) rhodium (IV) chloride (10 mol %) was added and the mixture heated to reflux. The solvent was removed by distillation and replaced with fresh acetonitrile / water (84 : 16) after which the mixture was allowed to cool to RT, at which point TLC analysis (50 % ethyl acetate / *n*-hexane) showed all of the starting material had been consumed. The mixture was concentrated *in vacuo*, redissolved in dichloromethane and washed with aqueous hydrochloric acid (4 M) then aqueous sodium hydroxide solution (1 M). The organic phase was dried (Na2SO4) and concentrated *in vacuo* to yield a brown glass which was further purified by silica gel flash chromatography (eluent: ethyl acetate / methanol 90 : 10) to yield the deprotected polyamine used without further purification.

***Method B: tetrakis(triphenylphosphine) palladium(0)***

A solution of polyamine, tetrakis(triphenylphosphine) palladium(0) (1 mol %) and 1,3-dimethylbarbituric acid (3.00 eq.) in anhydrous deoxygenated dichloromethane was stirred at RT overnight. The solution was washed with aqueous hydrochloric acid (4 M) then aqueous sodium hydroxide solution (1 M). The organic phase was dried (Na2SO4) and concentrated *in vacuo* to yield the deprotected polyamine used without further purification.

**(*S*)-2-*N*-Benzyl-((*S*)-2-*N*-benzyl-*N*-[(*S*)-2-*N*-benzyl-*N*-{(*S*)-2-*N*-benzylaminopropyl}amino-3-methylbutyl]amino-4-methyl-pentyl)amino-3-phenyl-propan-1-ol (13)**

Colourless oil, []D –40.9 (*c* 1.8 in CHCl3); **max (neat)/cm-1 3582, 3369, 3302, 3062, 3027, 2953, 2867, 1602, 1583, 1494 and 1453; HPLC retention time 25.7 min (conditions: Chiralcel OD-H, 2 % isopropanol / *n*-hexane, 220 nm UV detection, flow rate 0.5 ml min-1); **H (500 MHz; CDCl3; Me4Si) 0.56 (3H, d, *J* 5.6, CH3), 0.78 (3H, d, *J* 6.4, CH3), 0.82 (3H, d, *J* 6.8, CH3), 0.87 (3H, d, *J* 6.8, CH3), 0.91 (3H, d, *J* 6.4, CH3), 1.09-1.12 (1H, m, C*H*(CH3)2), 1.34-1.37 (1H, m, C*H*(CH3)2), 1.66-1.73 (1H, m, one of C*H*2CH(CH3)2), 1.94-1.99 (1H, m, other C*H*2CH(CH3)2), 2.35 (1H, dd, *J* 13.2, 7.4, one of CH2Ph), 2.42-2.48 (1H, m, NCH), 2.54 (1H, dd, *J* 13.2, 9.0, other CH2Ph), 2.59-2.98 (10H, m, NCHC*H*2N  2, NCH  3, one of CH2OH), 3.07 (1H, dd, *J* 13.3, 4.3, other CH2OH), 3.27 (1H, d, *J* 12.7, NCH2Ph), 3.32 (1H, d, *J* 14.0, NCH2Ph), 3.44 (1H, d, *J* 14.0, NCH2Ph), 3.53 (1H, d, *J* 13.8, NCH2Ph), 3.59 (1H, d, *J* 13.8, NCH2Ph), 3.65 (1H, d, *J* 12.7, NCH2Ph), 3.72 (1H, d, *J* 13.8, NCH2Ph), 3.79 (1H, d, *J* 13.8, CH2Ph), 7.07-7.31 (25H, m, Ph); **C (125 MHz; CDCl3; Me4Si) 14.6 (CH3), 18.8 (CH3), 19.8 (CH3), 21.7 (CH3), 22.4 (CH3), 24.1 (CH), 24.9 (CH), 33.2 (CH2), 41.1 (CH2), 48.0 (CH2), 52.0 (CH2), 52.2 (CH), 52.6 (CH2), 55.5 (CH2), 56.7 (CH), 57.2 (CH2), 60.8 (CH2), 61.1 (CH2), 61.5 (CH2), 64.2 (CH), 65.5 (CH), 126.5 (Ph), 127.0 (Ph), 127.1 (Ph), 127.2 (Ph), 127.6 (Ph), 128.4 (Ph), 128.5 (Ph), 128.6 (Ph), 128.8 (Ph), 128.9 (Ph), 129.0 (Ph), 129.1 (Ph), 129.4 (Ph), 129.5 (Ph), 140.0 (Ph), 140.1 (Ph), 141.0 (Ph), 141.5 (Ph); *m/z* (ES) 753 (M+, 98 %), 377 (100); HRMS: *m/z* (ES) 753.5443 (M+, C51H69N4O requires 753.5471.)

**(*S*)-2-*N*-Benzyl-((*S*)-2-*N*-benzyl-*N*-[(*S*)-2-*N*-benzyl-*N*-{(*S*)-2-*N*-benzylaminopropyl}amino-3-phenylpropyl]amino-3-methyl-butyl)amino-propan-1-ol (15)**

Colourless oil, []D +1.8 (*c* 2.2 in CHCl3); **max (neat)/cm-1 3367, 3302, 3061, 3027, 2960, 2869, 1601, 1494 and 1453; **H (500 MHz; CDCl3; Me4Si) 0.90 (3H, d, *J* 6.8, CH3), 0.92 (3H, d, *J* 6.4, CH3), 0.96 (3H, d, *J* 6.4, CH3), 0.99 (3H, d, *J* 6.8, CH3), 1.66 (1H, m, C*H*(CH3)2), 2.38-2.50 (8H, m, 1  NCH, one of C*H*2OH, 2  NCHC*H*2N, C*H*2Ph), 2.78-2.83 (3H, m, NCHCH2N, NCH), 2.92-3.02 (3H, m, 2  NCH, other C*H*2OH), 3.17 (1H, d, *J* 14.1, NCH2Ph), 3.19 (1H, d, *J* 12.8, NCH2Ph), 3.23 (1H, d, *J* 13.7, NCH2Ph), 3.28 (1H, d, *J* 14.1, NCH2Ph), 3.35 (1H, d, *J* 13.7, NCH2Ph), 3.52 (1H, d, *J* 13.7, NCH2Ph), 3.60 (1H, d, *J* 12.8, NCH2Ph), 3.82 (1H, d, *J* 13.7, NCH2Ph), 7.01-7.36 (25H, m, Ph); **C (125 MHz; CDCl3; Me4Si) 8.9 (CH3), 18.1 (CH3), 21.5 (CH3), 21.8 (CH3), 31.1 (CH), 36.6 (CH2), 49.2 (CH2), 50.9 (CH), 51.6 (CH2), 54.0 (CH), 54.4 (CH2), 55.4 (CH2), 55.9 (CH), 57.2 (CH2), 59.3 (CH2), 62.5 (CH), 64.1 (CH2), 65.0 (CH), 126.0 (Ph), 127.0 (Ph), 127.1 (Ph), 127.6 (Ph), 128.5 (Ph), 128.6 (Ph), 128.7 (Ph), 128.8 (Ph), 128.9 (Ph), 129.0 (Ph), 129.2 (Ph), 129.4 (Ph), 129.5 (Ph), 129.7 (Ph), 129.9 (Ph), 140.0 (Ph), 141.0 (Ph), 141.4 (Ph), 141.9 (Ph); *m/z* (ES) 711 (M+, 32 %), 356 (100), 278 (28); HRMS: *m/z* (ES) 711.4987 (M+, C48H63N4O requires 711.5002.)

**Ala-Val-Leu-Phe-Ala-Phe-Val-Ala octamine (16)**

(*S*)-2-*N*-Benzyl-((*S*)-2-*N*-benzyl-*N*-[(*S*)-2-*N*-benzyl-*N*-{(*S*)-2-*N*-allyl-*N*-benzylaminopropyl}amino-3-methylbutyl]amino-4-methyl-pentyl)amino-3-phenyl-propan-1-ol (**12**) (120 mg, 0.15 mmol) was dissolved in dichloromethane (5 ml), and the solution cooled to –78 C. Triethylamine (28.0 l, 0.20 mmol, 1.30 eq.) was added, followed by trifluoromethanesulfonic anhydride (28.0 l, 0.17 mmol, 1.10 eq.) The solution was stirred at –78 C for 1 h then allowed to warm to RT. (*S*)-2-*N*-Benzyl-((*S*)-2-*N*-benzyl-*N*-[(*S*)-2-*N*-benzyl-*N*-{(*S*)-2-*N*-benzylaminopropyl}amino-3-phenylpropyl]amino-3-methyl-butyl)amino-propan-1-ol (**15**) (120 mg, 0.17 mmol, 1.10 eq.) in dichloromethane (2 ml) was added and the mixture stirred at RT for 12 h. The reaction was quenched with aqueous sodium hydroxide solution (1 M, 5 ml) and extracted with dichloromethane (2  7 ml). The organic extracts were combined, dried (Na2SO4) and concentrated *in vacuo*. The product was purified by silica gel flash chromatography (eluent: ethyl acetate / *n*-hexane 20 : 80) to yield *Ala-Val-Leu-Phe-Ala-Phe-Val-Ala octamine* as a colourless oil (102 mg, 0.07 mmol, 47 %); []D –55.6 (*c* 0.9 in CHCl3); **max (neat)/cm-1 3435, 3085, 3062, 3027, 2957, 2867, 1642, 1602, 1494 and 1453; **C (125 MHz; CDCl3; Me4Si) 8.40 (CH3), 8.46 (CH3), 11.77 (CH3), 11.89 (CH3), 13.98 (CH3), 14.12 (CH3), 14.31 (CH3), 17.79 (CH), 18.07 (CH3), 18.12 (CH3), 20.65 (CH), 20.98 (CH), 24.02 (CH2), 24.05 (CH2), 24.22 (CH2), 29.66 (CH2), 29.70 (CH2), 30.85 (CH2), 31.89 (CH2), 31.93 (CH2), 36.46 (CH2), 42.70 (CH2), 49.59 (CH2), 52.73 (CH), 53.25 (CH2), 53.29 (CH2), 53.87 (CH2), 55.06 (CH), 55.24 (CH), 55.51 (CH2), 55.84 (CH2), 55.97 (CH2), 57.12 (CH2), 58.81 (CH2), 59.21 (CH2), 59.38 (CH2), 60.21 (CH2), 61.17 (CH2), 62.19 (CH), 62.25 (CH), 62.53 (CH2), 63.26 (CH2), 63.35 (CH2), 64.10 (CH2), 64.25 (CH), 64.30 (CH2), 64.48 (CH), 64.84 (CH), 65.30 (CH), 69.35 (CH2), 116.10 (CH=*C*H2), 119.32 (Ph), 121.66 (Ph), 125.32 (Ph), 126.27 (Ph), 126.55 (Ph), 126.61 (Ph), 126.68 (Ph), 127.08 (Ph), 127.30 (Ph), 127.66 (Ph), 127.84 (Ph), 127.97 (Ph), 128.02 (Ph), 128.05 (Ph), 128.13 (Ph), 128.17 (Ph), 128.26 (Ph), 128.29 (Ph), 128.35 (Ph), 128.47 (Ph), 128.51 (Ph), 128.59 (Ph), 128.71 (Ph), 128.74 (Ph), 128.88 (Ph), 128.90 (Ph), 128.98 (Ph), 129.06 (Ph), 129.12 (Ph), 129.22 (Ph), 129.30 (Ph), 129.36 (Ph), 129.47 (Ph), 129.53 (Ph), 129.72 (Ph), 137.74 (*C*H=CH2), 140.66 (Ph), 140.74 (Ph), 140.85 (Ph), 140.96 (Ph), 145.36 (Ph); *m/z* (ES) 1486 (M+, 63 %), 733 (33), 646 (52), 586 (80), 411 (100), 324 (55).

**Ala-Phe-Val-Ala-Ala-Phe-Val-Ala octamine (17)**

(*S*)-2-*N*-Benzyl-((*S*)-2-*N*-benzyl-*N*-[(*S*)-2-*N*-benzyl-*N*-{(*S*)-2-*N*-allyl-*N*-benzylaminopropyl}amino-3-phenylpropyl]amino-3-methyl-butyl)amino-propan-1-ol (**14**) (140 mg, 0.19 mmol) was dissolved in dichloromethane (5 ml), and the solution cooled to –78 C. Triethylamine (34.0 l, 0.24 mmol, 1.30 eq.) was added, followed by trifluoromethanesulfonic anhydride (35.0 l, 0.21 mmol, 1.10 eq.) The solution was stirred at –78 C for 30 min then allowed to warm to RT. (*S*)-2-*N*-Benzyl-((*S*)-2-*N*-benzyl-*N*-[(*S*)-2-*N*-benzyl-*N*-{(*S*)-2-*N*-benzylaminopropyl}amino-3-phenylpropyl]amino-3-methyl-butyl)amino-propan-1-ol (**15**) (146 mg, 0.21 mmol, 1.10 eq.) in dichloromethane (2 ml) was added and the mixture stirred at RT for 12 h. The reaction was quenched with aqueous sodium hydroxide solution (1 M, 5 ml) and extracted with dichloromethane (2  7 ml). The organic extracts were combined, dried (Na2SO4) and concentrated *in vacuo*. The product was purified by silica gel flash chromatography (eluent: ethyl acetate / *n*-hexane 20 : 80) to yield *(Ala-Phe-Val-Ala)2 octamine* as a colourless oil (118 mg, 0.08 mmol, 43 %); []D –36.0 (*c* 0.5 in CHCl3); max (neat)/cm-1 3477, 3061, 3027, 2959, 2846, 1601, 1585, 1495 and 1453; **C (125 MHz; CDCl3; Me4Si) 8.42 (CH3), 8.47 (CH3), 11.20 (CH3), 11.45 (CH3), 11.62 (CH3), 12.72 (CH3), 14.12 (CH3), 14.40 (CH3), 20.99 (CH), 21.15 (CH), 21.34 (CH), 22.69 (CH2), 29.70 (CH2), 30.29 (CH), 30.88 (CH), 36.51 (CH2), 36.58 (CH2), 48.71 (CH2), 49.67 (CH2), 52.53 (CH), 53.04 (CH2), 53.12 (CH2), 53.80 (CH2), 53.85 (CH2), 53.91 (CH), 53.98 (CH2), 54.28 (CH2), 54.71 (CH2), 55.81 (CH2), 55.91 (CH2), 57.00 (CH2), 57.09 (CH2), 60.30 (CH), 63.28 (CH2), 63.35 (CH2), 63.86 (CH), 64.29 (CH), 115.99 (CH=*C*H2), 125.20 (Ph), 125.29 (Ph), 126.32 (Ph), 126.42 (Ph), 126.49 (Ph), 126.52 (Ph), 126.60 (Ph), 126.66 (Ph), 126.72 (Ph), 127.31 (Ph), 127.36 (Ph), 127.71 (Ph), 127.79 (Ph), 127.97 (Ph), 128.04 (Ph), 128.11 (Ph), 128.14 (Ph), 128.20 (Ph), 128.24 (Ph), 128.28 (Ph), 128.33 (Ph), 128.39 (Ph), 128.43 (Ph), 128.58 (Ph), 128.68 (Ph), 128.86 (Ph), 129.00 (Ph), 129.03 (Ph), 129.13 (Ph), 129.16 (Ph), 129.22 (Ph), 129.25 (Ph), 129.28 (Ph), 129.36 (Ph), 129.43 (Ph), 129.52 (Ph), 129.59 (Ph), 129.74 (Ph), 137.79 (*C*H=CH2), 139.51 (Ph), 140.50 (Ph), 140.81 (Ph), 140.88 (Ph), 140.96 (Ph), 141.29 (Ph), 141.41 (Ph), 141.45 (Ph), 141.63 (Ph), 141.70 (Ph); *m/z* (ES) 1445 (MH+, 7 %), 723 (MH22+, 32), 376 (39); HRMS: *m/z* (ES) 722.5110 (MH2+, C99H126N8O requires 722.5106.)

## Ala-Phe-Val-Ala-Ala-Val-Leu-Phe octamine (18)

(*S*)-2-*N*-Benzyl-((*S*)-2-*N*-benzyl-*N*-[(*S*)-2-*N*-benzyl-*N*-{(*S*)-2-*N*-allyl-*N*-benzylaminopropyl}amino-3-phenylpropyl]amino-3-methyl-butyl)amino-propan-1-ol (**14**) (135 mg, 0.18 mmol) was dissolved in dichloromethane (5 ml), and the solution cooled to –78 C. Triethylamine (32.0 l, 0.23 mmol, 1.30 eq.) was added, followed by trifluoromethanesulfonic anhydride (34.0 l, 0.20 mmol, 1.10 eq.) The solution was stirred at –78 C for 30 min then allowed to warm to RT. (*S*)-2-*N*-Benzyl-((*S*)-2-*N*-benzyl-*N*-[(*S*)-2-*N*-benzyl-*N*-{(*S*)-2-*N*-benzylaminopropyl}amino-3-methylbutyl]amino-4-methyl-pentyl)amino-3-phenyl-propan-1-ol (**13**) (150 mg, 0.20 mmol, 1.10 eq.) in dichloromethane (2 ml) was added and the mixture stirred at RT for 12 h. The reaction was quenched with aqueous sodium hydroxide solution (1 M, 5 ml) and extracted with dichloromethane (2  7 ml). The organic extracts were combined, dried (Na2SO4) and concentrated *in vacuo*. The product was purified by silica gel flash chromatography (eluent: ethyl acetate / *n*-hexane 40 : 60) to yield *Ala-Phe-Val-Ala-Ala-Val-Leu-Phe octamine* as a colourless oil which solidified on standing (87.0 mg, 0.06 mmol, 33 %); mp 56-58 C; []D –48.0 (*c* 1.2 in CHCl3); **max (neat)/cm-1 3436, 3084, 3061, 3026, 2956, 2868, 2827, 1641, 1602, 1494 and 1453; **C (125 MHz; CDCl3; Me4Si) 11.60 (CH3), 12.57 (CH3), 14.19 (CH3), 14.77 (CH3), 18.09 (CH3), 20.48 (CH3), 21.01 (CH3), 21.04 (CH3), 21.14 (CH), 21.45 (CH), 21.52 (CH), 21.67 (CH), 23.74 (CH), 23.81 (CH), 24.28 (CH), 29.02 (CH), 30.30 (CH), 32.62 (CH2), 36.58 (CH2), 41.39 (CH2), 49.01 (CH2), 51.61 (CH2), 52.53 (CH), 53.04 (CH2), 53.76 (CH2), 53.90 (CH2), 54.74 (CH2), 54.99 (CH2), 55.07 (CH2), 55.49 (CH2), 55.86 (CH2), 56.30 (CH), 56.61 (CH), 57.01 (CH), 60.29 (CH), 60.36 (CH2), 61.16 (CH2), 62.62 (CH2), 63.89 (CH), 64.28 (CH), 115.98 (CH=*C*H2), 125.19 (Ph), 126.18 (Ph), 126.31 (Ph), 126.47 (Ph), 126.51 (Ph), 126.63 (Ph), 126.71 (Ph), 126.73 (Ph), 126.83 (Ph), 127.23 (Ph), 127.29 (Ph), 127.55 (Ph), 127.65 (Ph), 127.70 (Ph), 127.78 (Ph), 127.86 (Ph), 127.96 (Ph), 128.02 (Ph), 128.07 (Ph), 128.12 (Ph), 128.13 (Ph), 128.32 (Ph), 128.38 (Ph), 128.43 (Ph), 128.52 (Ph), 128.67 (Ph), 128.75 (Ph), 128.85 (Ph), 128.98 (Ph), 129.01 (Ph), 129.05 (Ph), 129.10 (Ph), 129.20 (Ph), 129.26 (Ph), 129.35 (Ph), 129.58 (Ph), 129.71 (Ph), 137.77 (*C*H=CH2), 139.56 (Ph), 139.36 (Ph), 140.46 (Ph), 140.87 (Ph), 141.08 (Ph), 141.43 (Ph), 141.68 (Ph), 141.74 (Ph); *m/z* (ES) 1486 (M+, 39 %), 885 (92), 769 (73), 622 (34), 554 (92), 433 (100), 385 (72), 253 (48).
